# Supplementary material for: Longitudinal transcriptional analysis of peripheral blood leukocytes in COVID-19 convalescent donors
Source: Springer Nature journal article supplement (doi:10.1186/s12967-022-03751-7), 2022-12-12
Supplement: MOESM5 [file 23816268]

## Supplementary Figure S1

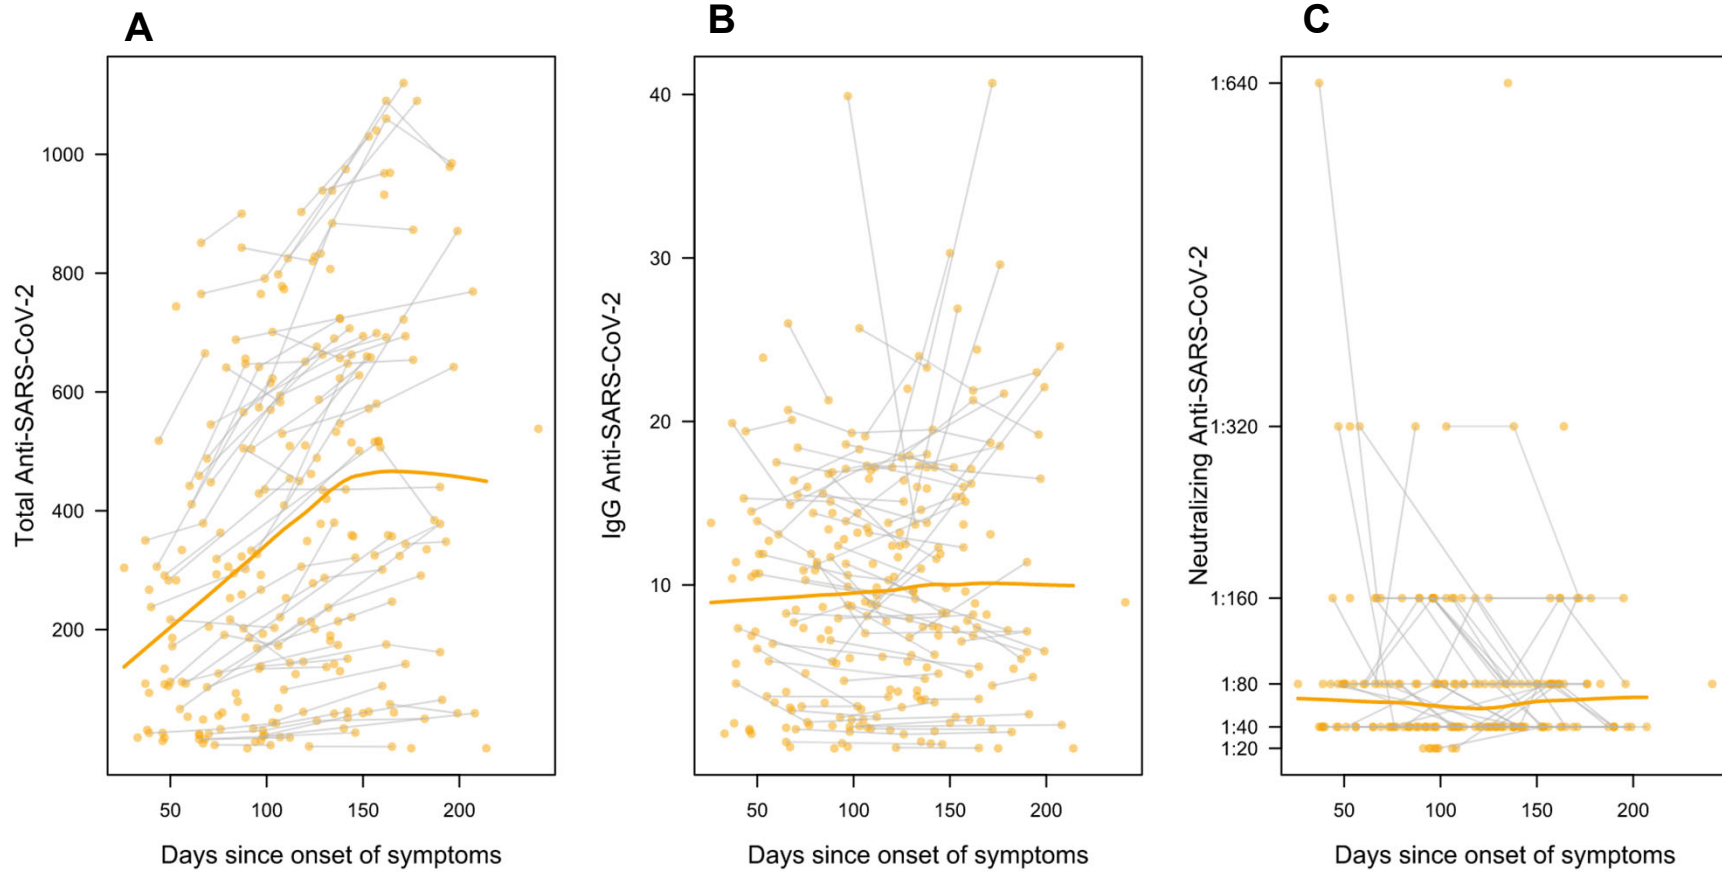

**A)** Total Anti-SARS-CoV-2, **B)** IgG Anti-SARS-CoV2, and **C)** Neutralizing antibody titers in individuals who donated on one or more occasions.
