# Supplementary material for: Longitudinal transcriptional analysis of peripheral blood leukocytes in COVID-19 convalescent donors
Source: J Transl Med. 2022 Dec 12;20:587. doi: 10.1186/s12967-022-03751-7 (PMC9742656; doi:10.1186/s12967-022-03751-7)
Supplement: Supplementary file 4 — Additional file 4: Table S4. Comparison of the expression of VJ gene combinations among CCDs and healthy donors. [file 12967_2022_3751_MOESM4_ESM.xlsx]

## Sheet: TCR gene vs. cluster DE results
TCR Diversity Region	log2.fold.change.P1...CCD	p.value	BH.FDR
TRAV9.1_TCRVA_014.1	1.26342	0.000136942	0.00143976
TRGV9_ENST00000444775.1	1.22763	0.000100588	0.00141687
TRBV6.8_TCRVB_016.1	1.1425	0.000258989	0.00224458
TRAV7_TCRVA_008.1	0.994853	0.000583	0.00356659
TRAV11_TCRVA_017.1	0.799286	0.0180343	0.0360685
TRGV4_ENST00000390345.1	0.749545	0.0283309	0.0483018
TRAV18_TCRVA_026.1	0.653879	0.0203253	0.0398836
TRAV39_TCRVA_044.1	-0.642892	0.0271101	0.0477873
TRBV20.1_TCRVB_041.1	-0.659587	0.0234993	0.0436416
TRBV7.6_TCRVB_021.1	-0.679799	0.0250035	0.0456203
TRAV20_TCRVA_028.1	-0.687301	0.0137069	0.03099
TRAV1.1_TCRVA_001.1	-0.693165	0.02792	0.0483018
TRBV5.6_TCRVB_009.1	-0.69345	0.0217848	0.0415724
TRAV35_TCRVA_040.1	-0.707998	0.0166683	0.0342606
TRAV10_TCRVA_016.1	-0.738473	0.0137071	0.03099
TRAV41_TCRVA_046.1	-0.74297	0.0110756	0.0267875
TRAV4_TCRVA_005.1	-0.750206	0.0219854	0.0415724
TRBV10.3_TCRVB_028.1	-0.775034	0.0107226	0.0265512
TRBV11.2_TCRVB_030.1	-0.783484	0.00957181	0.0248867
TRBV9_TCRVB_025.1	-0.784327	0.0168009	0.0342606
TRBV2_TCRVB_001.1	-0.795838	0.0154162	0.0334018
TRBV7.9_TCRVB_024.1	-0.811851	0.0118653	0.0280452
TRAV16_TCRVA_024.1	-0.817974	0.0100999	0.0256192
TRAV26.1_TCRVA_034.1	-0.819677	0.00818967	0.0228485
TRBC1.2_ENST00000466254.1	-0.827926	0.00279444	0.0126357
TRBV19_TCRVB_040.1	-0.831429	0.00407416	0.0149821
TRBV6.5_TCRVB_014.1	-0.838381	0.00316778	0.0126711
TRBV29.1_TCRVB_046.1	-0.841678	0.00834848	0.0228485
TRAV27_TCRVA_036.1	-0.855464	0.00556536	0.0175393
TRAV13.2_TCRVA_022.1	-0.861046	0.00616679	0.0188631
TRBV15_TCRVB_037.1	-0.865916	0.00701595	0.0208474
TRBV6.6_ENST00000390371.1	-0.869824	0.00494126	0.0170395
TRBV4.2_TCRVB_004.1	-0.87297	0.0158924	0.0337307
TRBV10.1_ENST00000390364.1	-0.880649	0.00822906	0.0228485
TRAV14_TCRVA_023.1	-0.89841	0.00521713	0.0170395
TRAV12.1_TCRVA_018.1	-0.906224	0.00305682	0.0126711
TRBV28_TCRVB_045.1	-0.9076	0.0260578	0.0467244
TRGV8_ENST00000390343.1	-0.919087	0.00870598	0.023216
TRAV8.6_TCRVA_013.1	-0.921352	0.00152331	0.00792122
TRBV3.1_TCRVB_002.1	-0.957359	0.00524293	0.0170395
TRBV12.3_TCRVB_032.1	-0.967737	0.00209233	0.00989101
TRAV23_TCRVA_031.1	-0.971252	0.00306322	0.0126711
TRAV29_TCRVA_037.1	-0.971908	0.00143853	0.00787407
TRAV9.2_TCRVA_015.1	-1.01602	0.00108879	0.00629078
TRAV1.2_TCRVA_002.1	-1.02327	0.00389468	0.0149821
TRDC_ENST00000390477.1	-1.03146	0.00417771	0.0149821
TRDV2_ENST00000390469.1	-1.04474	0.0147635	0.0326681
TRGC2_ENST00000436911.1	-1.04925	0.00187502	0.00928583
TRAV17_TCRVA_025.1	-1.06247	0.000369787	0.00274699
TRBV27_TCRVB_044.1	-1.08341	0.000430383	0.00298399
TRAV3_TCRVA_004.1	-1.1147	0.00049773	0.00323524
TRBV6.1_TCRVB_011.1	-1.13434	0.000363796	0.00274699
TRAV13.1_TCRVA_021.1	-1.14931	0.00010899	0.00141687
TRAV19_TCRVA_027.1	-1.15632	0.000138438	0.00143976
TRAV38.2_TCRVA_043.1	-1.16669	0.000247287	0.00224458
TRAV12.3_TCRVA_020.1	-1.17211	0.000108816	0.00141687
TRAV25_TCRVA_033.1	-1.19009	7.85193e-05	0.00141687
TRAV21_TCRVA_029.1	-1.36961	4.31666e-05	0.00112233
TRAC_ENST00000611116.1	-1.46132	9.14677e-07	4.81889e-05
TRAV12.2_TCRVA_019.1	-1.51191	9.2671e-07	4.81889e-05
TRAV26.2_TCRVA_035.1	-1.65045	4.38217e-06	0.000151915
